# Supplementary material for: Ligand and Structure-Based Virtual Screening in Combination, to Evaluate Small Organic Molecules as Inhibitors for the XIAP Anti-Apoptotic Protein: The Xanthohumol Hypothesis
Source: MDPI journal article supplement (doi:10.3390/molecules27154825), 2022-07-28
Supplement: s1 [file s1]

## Supplementary Material

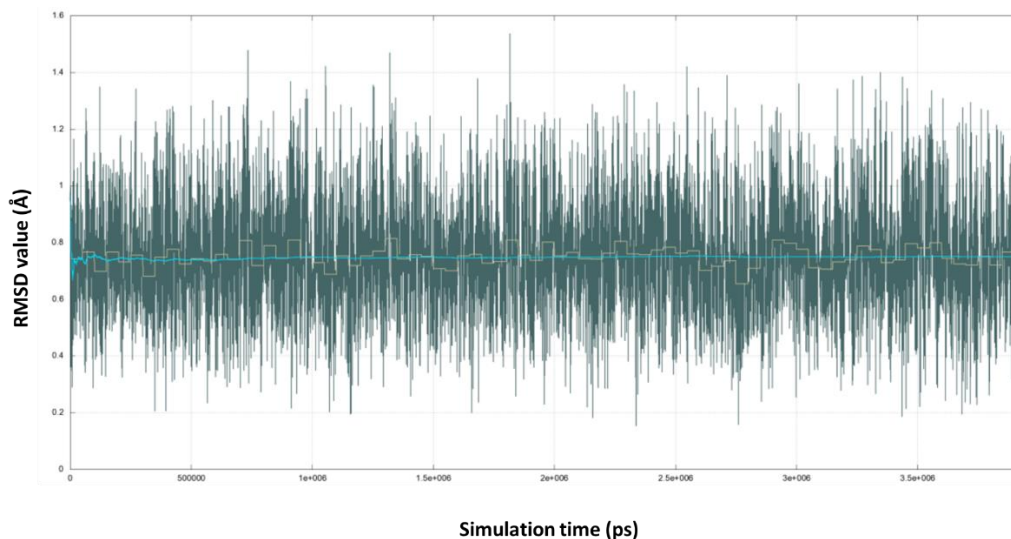

**Figure S1:** RMSD value for (E)-1-(4-methoxyphenyl)-3-(p-tolyl) prop-2-en-1-one during simulation time.

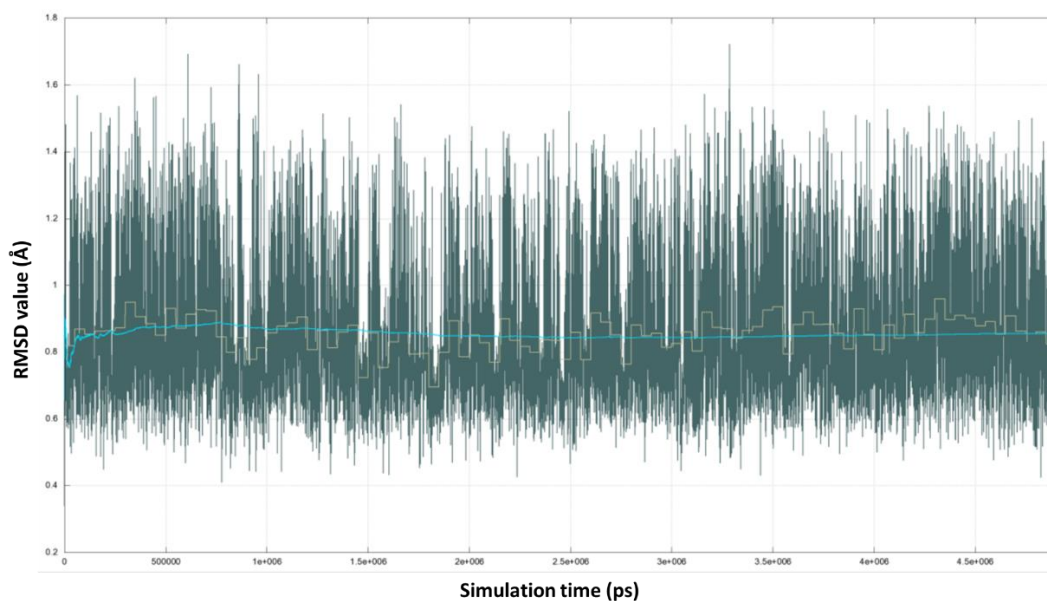

**Figure S2:** RMSD value for (E)-3-(4-hydroxyphenyl)-1-(2,4,6-trihydroxyphenyl) prop-2-en-1-one during simulation time.

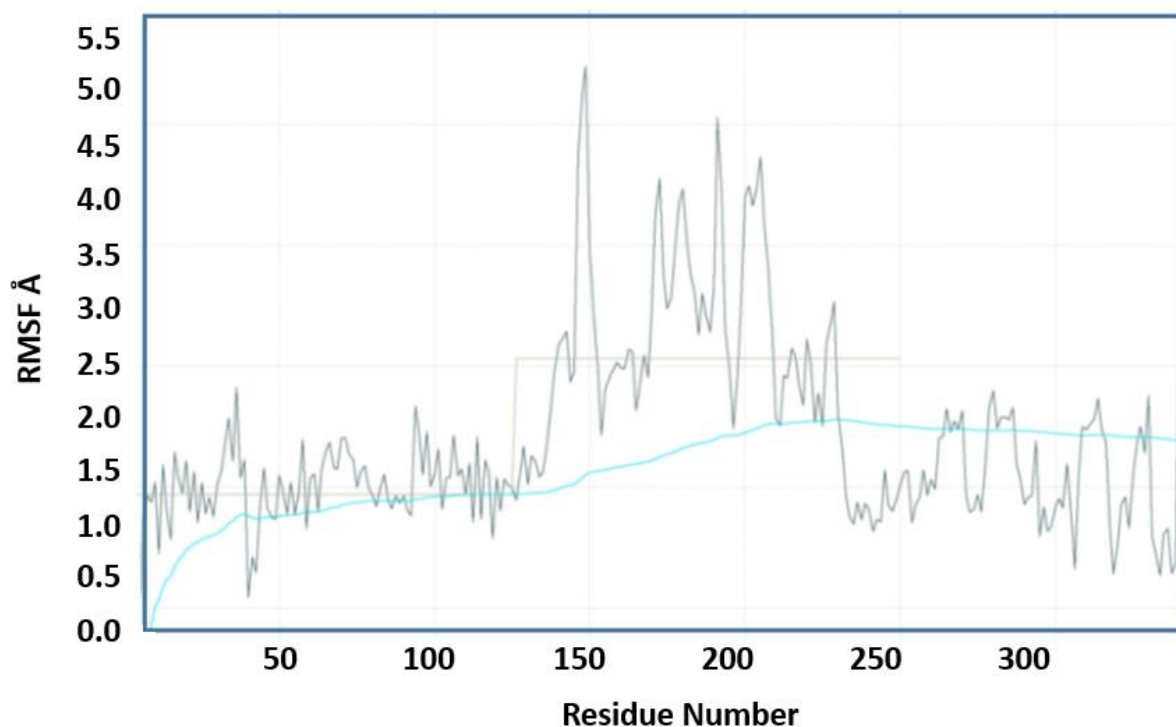

**Figure S3:** RMSF value for (E)-3-(4-hydroxyphenyl)-1-(2,4,6-trihydroxyphenyl) prop-2-en-1-one during simulation time.

**Table S1:** Pharmacophore model.

|                   | <u><b>x</b></u> | <u><b>y</b></u> | <u><b>z</b></u> | <u><b>Radius</b></u> | <u><b>Enabled</b></u> |
|-------------------|-----------------|-----------------|-----------------|----------------------|-----------------------|
| Hydrogen Acceptor | 50.3            | 63.89           | 7.03            | 0.5                  |                       |
| Hydrogen Acceptor | 53.19           | 67.16           | 5.08            | 0.5                  |                       |
| Hydrogen Acceptor | 53.1            | 59.29           | 7.83            | 0.5                  |                       |
| Hydrogen Acceptor | 51.05           | 58.12           | 13.78           | 0.5                  |                       |
| Hydrogen Acceptor | 53.1            | 59.29           | 7.83            | 0.5                  |                       |
| Hydrogen Donor    | 51.05           | 58.12           | 13.78           | 1                    |                       |
| Hydrogen Donor    | 50.1            | 62.51           | 7.11            | 1                    |                       |
| Hydrogen Donor    | 54.32           | 67.29           | 4.26            | 1                    |                       |
| Hydrogen Donor    | 52.78           | 64.59           | 6.02            | 1                    |                       |
| Hydrophobic       | 51.6            | 59.05           | 11.23           | 1                    |                       |
